# Supplementary material for: The microbiota is dispensable for the early stages of peripheral regulatory T cell induction within mesenteric lymph nodes
Source: PubMed Central journal article supplement (PMC8093251; doi:10.1038/s41423-021-00647-2), 2021-03-24

### Supplementary Figure 3

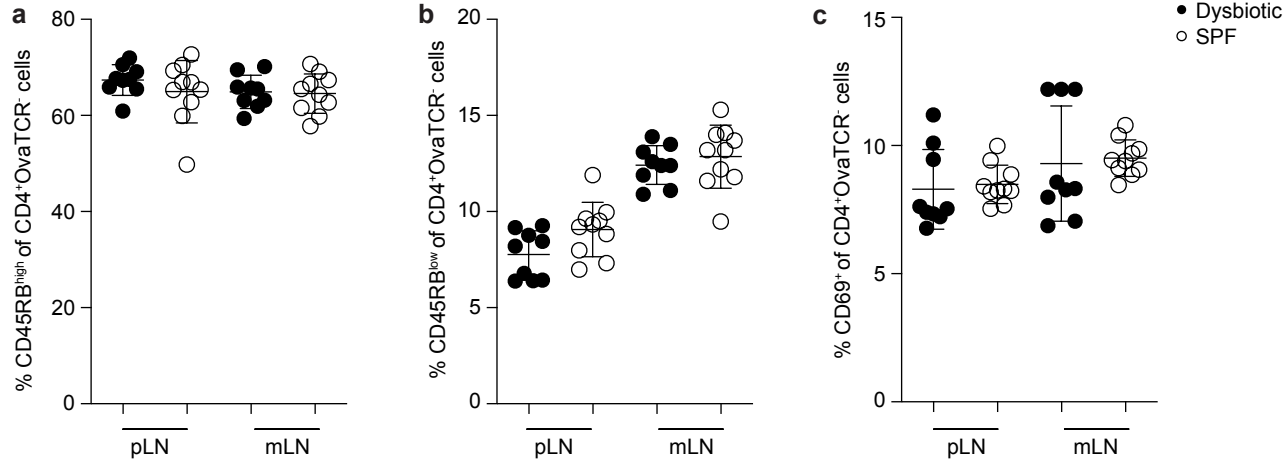

Supplement: 41423_2021_647_MOESM3_ESM.pdf [file 41423_2021_647_MOESM3_ESM.pdf]
